# Supplementary material for: PET imaging facilitates antibody screening for synergistic radioimmunotherapy with a 177Lu-labeled αPD-L1 antibody
Source: Theranostics. 2021 Jan 1;11(1):304–15. doi: 10.7150/thno.45540 (PMC7681088; doi:10.7150/thno.45540)
Supplement: Supplementary file 1 — Supplementary figures and tables. [file thnov11p0304s1.pdf]

## **Supporting information for**

### **PET Imaging Facilitates Antibody Screening for Synergistic Radioimmunotherapy with a $^{177}\text{Lu}$ -labeled $\alpha\text{PD-L1}$ Antibody**

Jingyun Ren<sup>1</sup>, Mengxin Xu<sup>2</sup>, Junyi Chen<sup>2</sup>, Jie Ding<sup>1</sup>, Peipei Wang<sup>1</sup>, Li Huo<sup>1\*</sup>, Fang Li<sup>1\*</sup>, Zhibo Liu<sup>2,3\*</sup>

<sup>1</sup>Department of Nuclear Medicine, Peking Union Medical College Hospital, Chinese Academy of Medical Science & Peking Union Medical College, Beijing Key Laboratory of Molecular Targeted Diagnosis and Therapy in Nuclear Medicine, Beijing, China.

<sup>2</sup>Radiochemistry and Radiation Chemistry Key Laboratory of Fundamental Science, Beijing National Laboratory for Molecular Sciences, College of Chemistry and Molecular Engineering, Peking University, Beijing, 100871, China

<sup>3</sup>Peking University-Tsinghua University Center for Life Sciences, Beijing, 100871, China

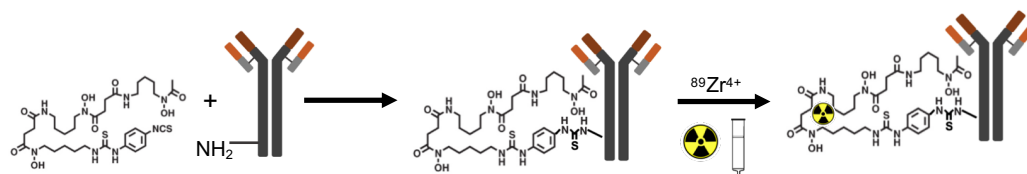

**Figure S1:** Synthesis and radiolabeling of  $^{89}\text{Zr}$ -DFO- $\alpha$ PD-L1.

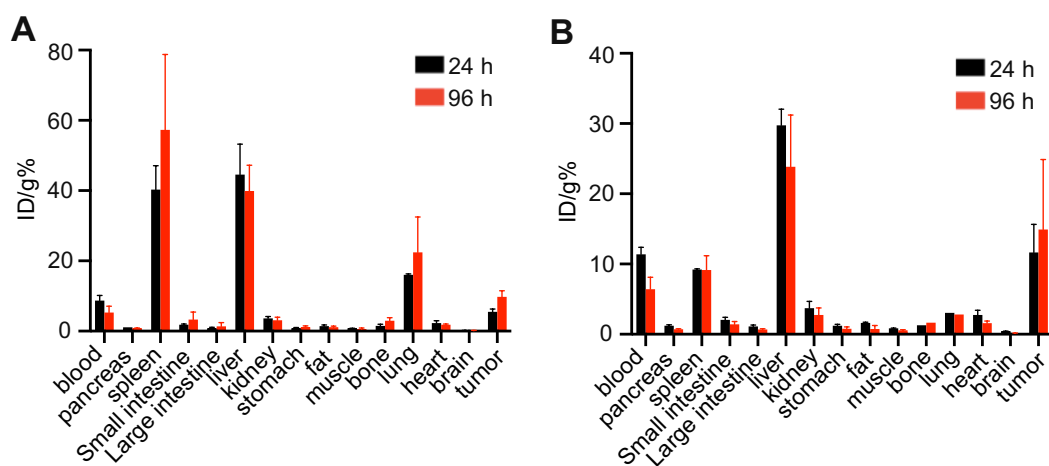

**Figure S2:** Biodistribution of  $^{89}\text{Zr}$ -DFO-Y001 (A) and  $^{89}\text{Zr}$ -DFO-Y002 (B) in MC38 tumor bearing mice at 24 and 96 h post injection (n= 4).

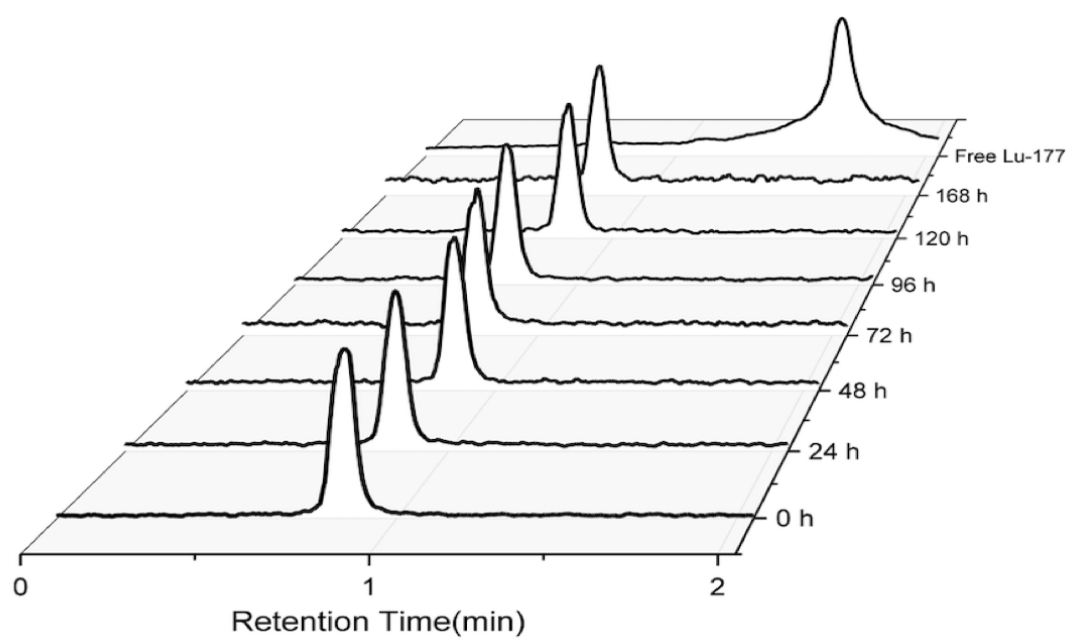

**Figure S3:** Stability experiment of  $^{177}\text{Lu}$ -DOTA-Y003 after incubation in PBS for 168 h.

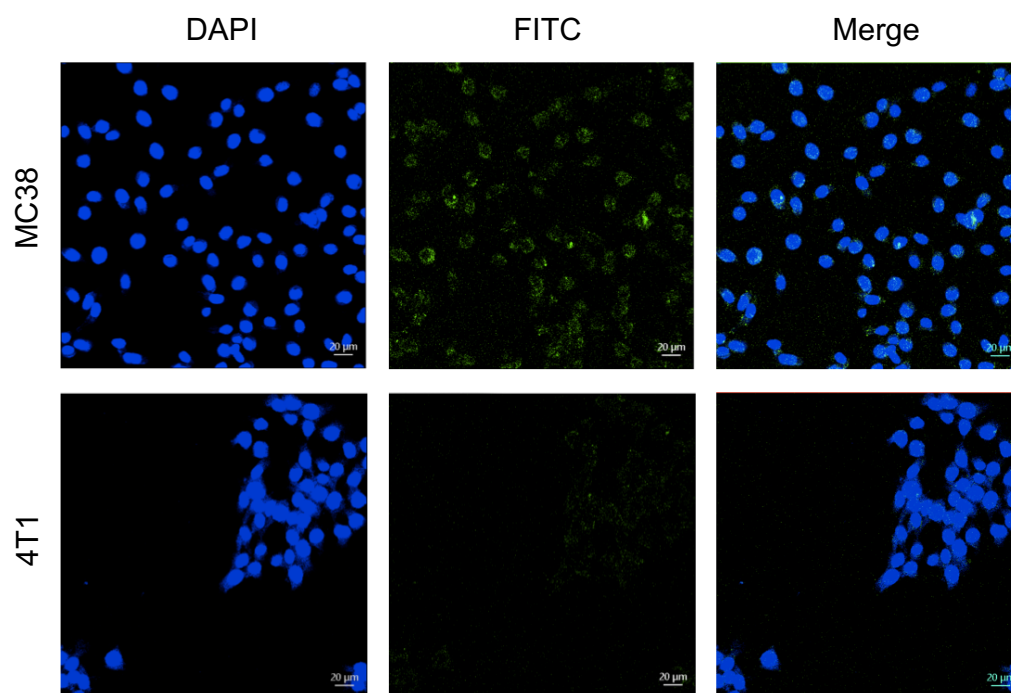

**Figure S4:** Immunofluorescence for PD-L1 expression in 4T1 and MC38 cell lines.

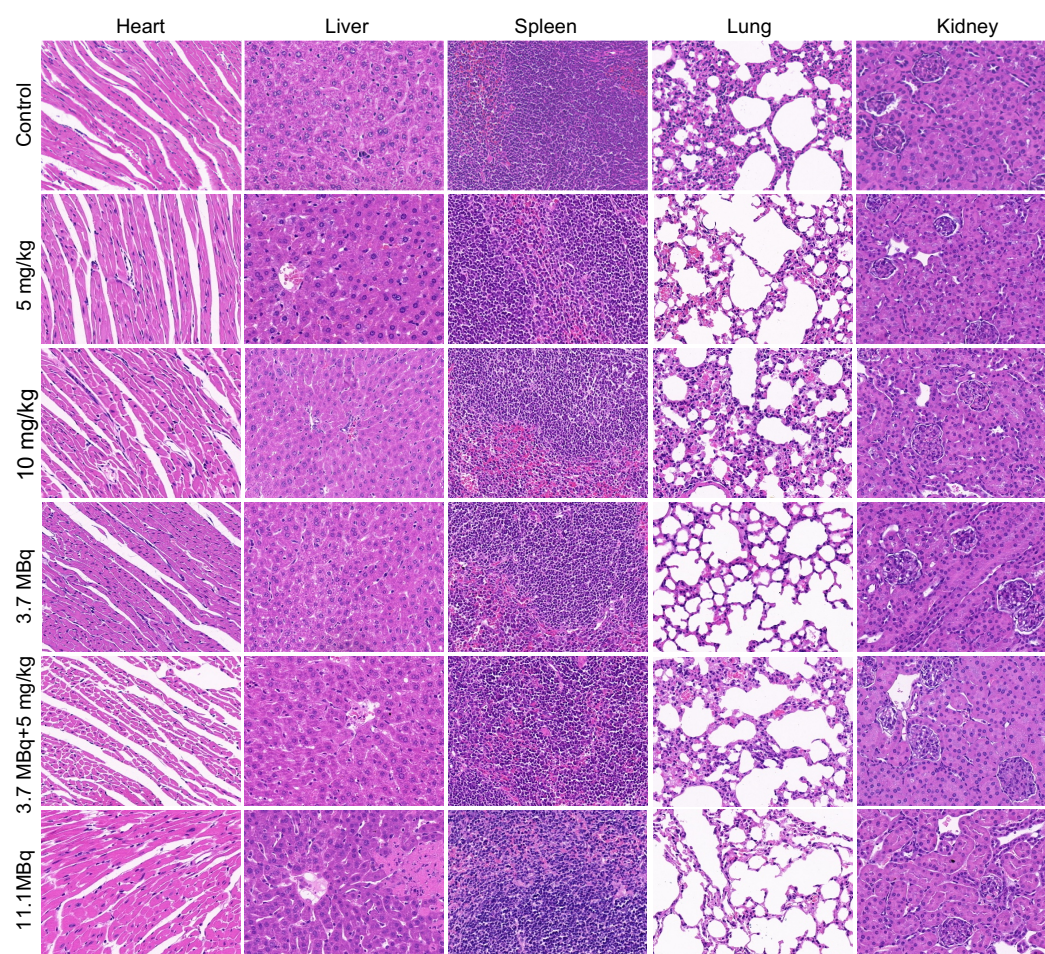

**Figure S5.** Representative H&E staining of major organ tissues from mice with the indicated treatments (n = 3/group).
